# Supplementary material for: Maternal metabolic health drives mesenchymal stem cell metabolism and infant fat mass at birth
Source: JCI journal article supplement (doi:10.1172/jci.insight.146606), 2021-06-01
Supplement: sd1 [file 1]

**Supplemental Table 1.** ProteinSimple WES Antibody and Assay Conditions

| Antibody | Manufacturer              | Cat. No.    | Ab Dilution | Sample [protein] |
|----------|---------------------------|-------------|-------------|------------------|
| β-Actin  | Cell Signaling Technology | 4970        | 1:50        | 0.2 µg/µL        |
| PPARγ    | Cell Signaling Technology | 2435        | 1:25        | 0.8 µg/µL        |
| SREBP1   | Novus Biologicals         | NB100-2215  | 1:25        | 0.2 µg/µL        |
| FAS      | Cell Signaling Technology | 3180        | 1:500       | 0.2 µg/µL        |
| SCD1     | R&D Systems               | AF7550      | 10 µg/mL    | 0.2 µg/µL        |
| DGAT1    | Novus Biologicals         | NB100-57086 | 1:50        | 0.4 µg/µL        |
| ACS      | Cell Signaling Technology | 3658        | 1:200       | 0.2 µg/µL        |

# SUPPLEMENTARY FIGURE 1:

## ASM/CO<sub>2</sub>: mitochondrial efficiency for fat oxidation

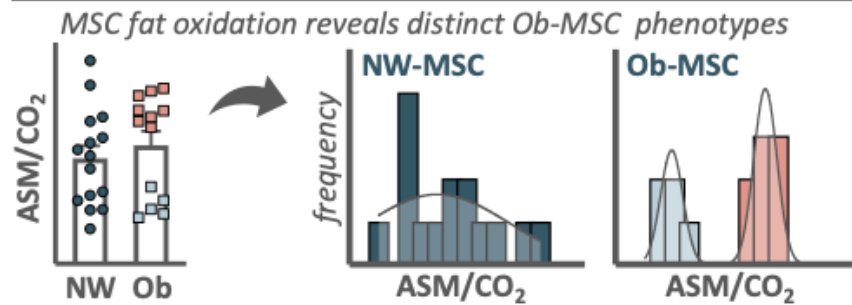

Previously reported MSC metabolism distinguishing Ob-MSC groups (11).

Reprinted from *Molecular Metabolism*, 6(11), Kristen E. Boyle,

Zachary W. Patinkin, Allison L.B. Shapiro, Carly Bader, Lauren

Vanderlinden, Katerina Kechris, Rachel C. Janssen, Rebecca J. Ford,

Brennan K. Smith, Gregory R. Steinberg, Elizabeth J. Davidson, Ivana

V. Yang, Dana Dabelea, and Jacob E. Friedman, Maternal obesity alters

fatty acid oxidation, AMPK activity, and associated DNA methylation

in mesenchymal stem cells from human infants, 1503–1516, Copyright

(2017), with permission from Elsevier.

9  
10  
11

## 11

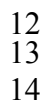

## 14

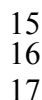

18 S2C. FAS

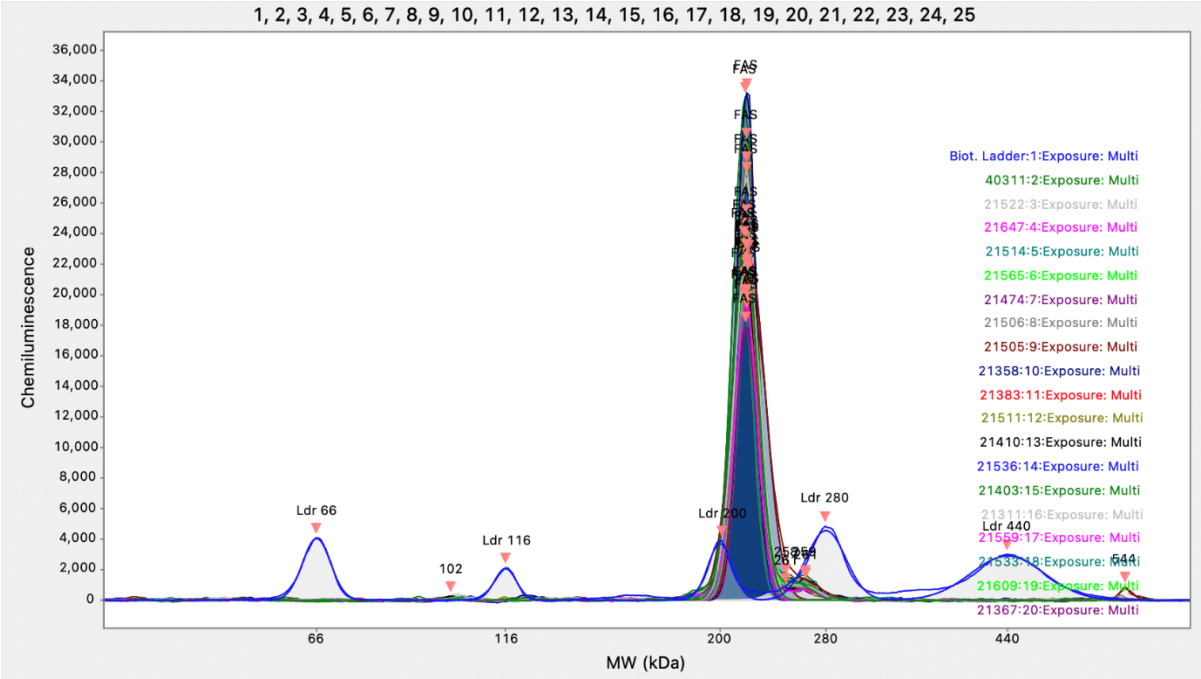

19  
20  
21 S2D. SCD-1

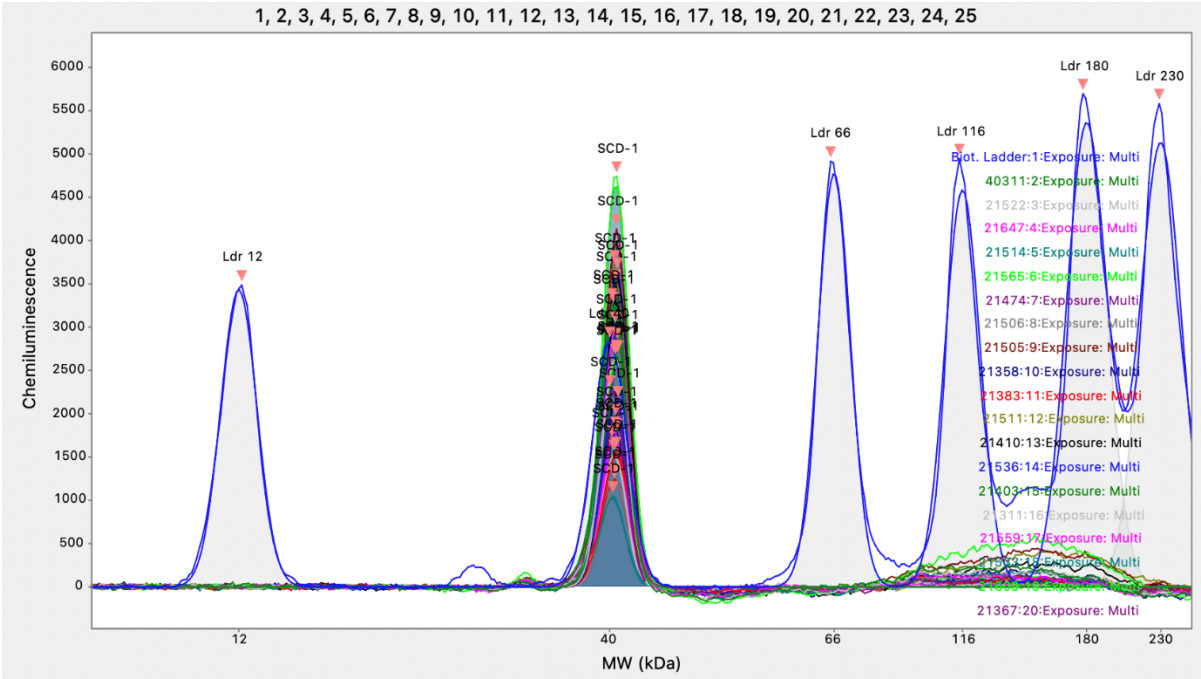

27  
28  
29  
30  
31

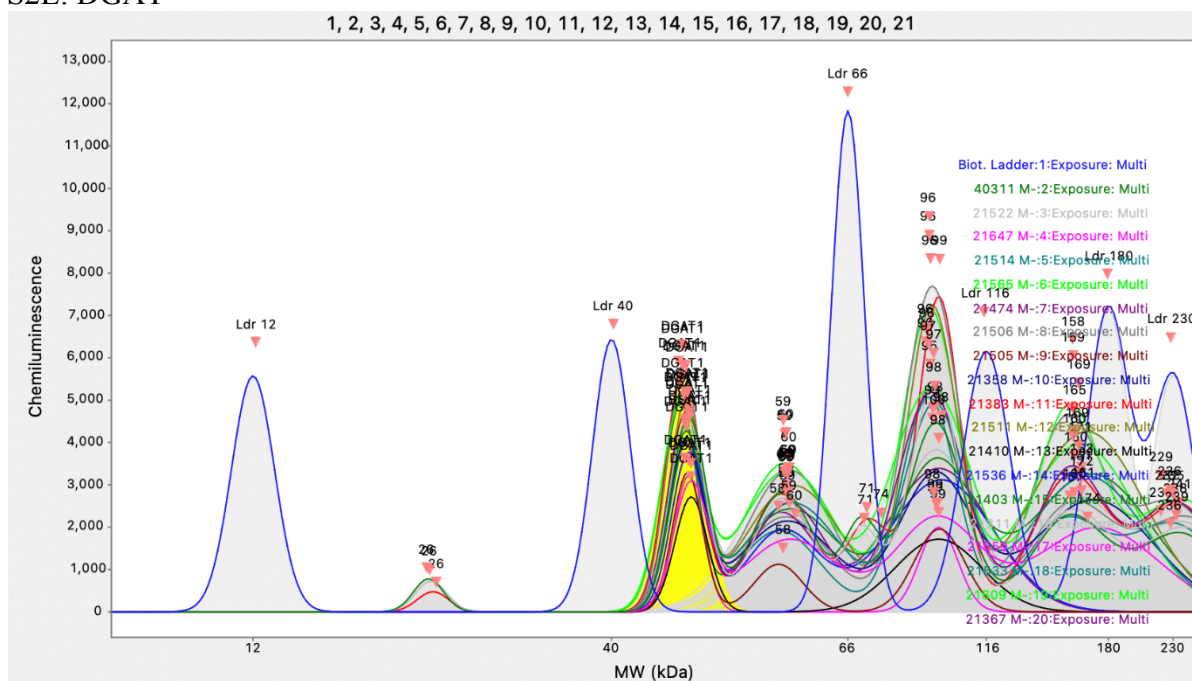

*\*\*Please note ACS (at MW ~118 kDa) was run multi-plexed with an additional protein at 81 KDa.*

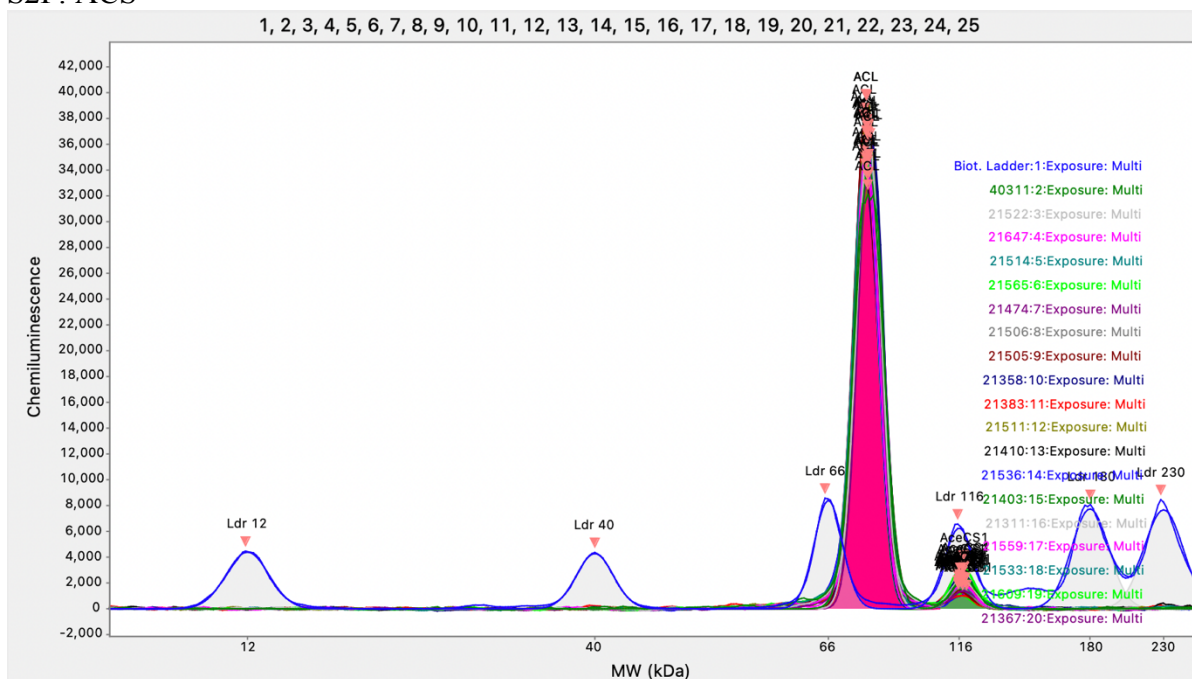



35 S2G.  $\beta$ -actin

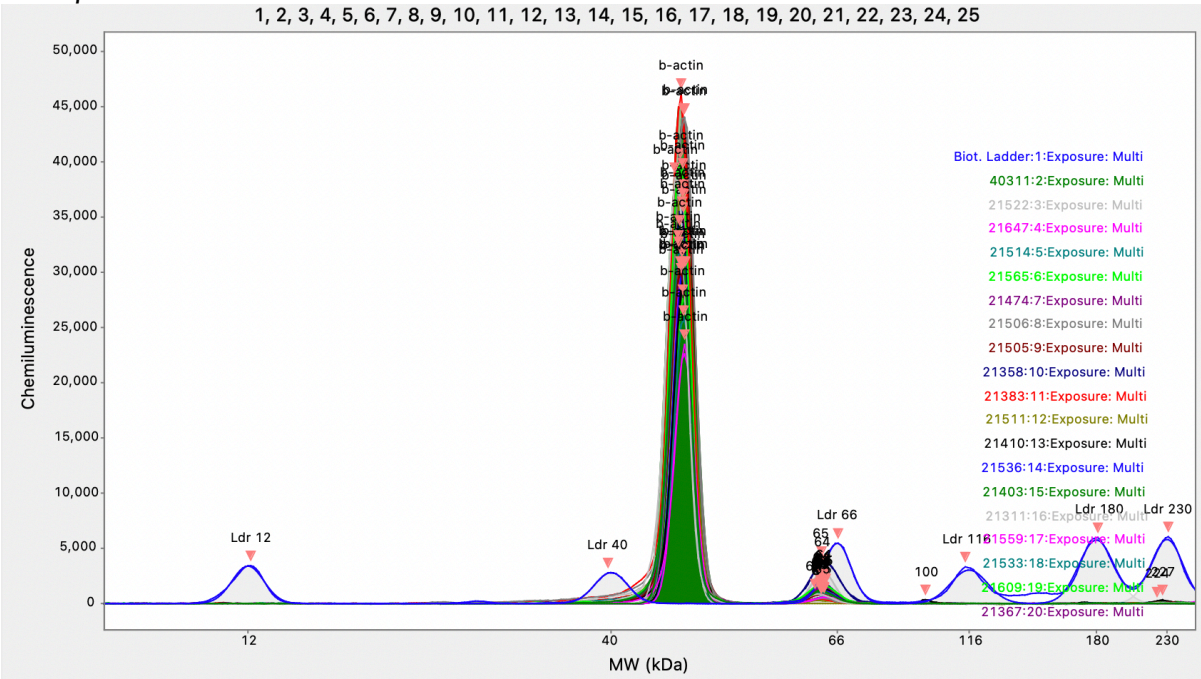

36  
37  
38  
39

**SUPPLEMENTARY FIGURE 3:**

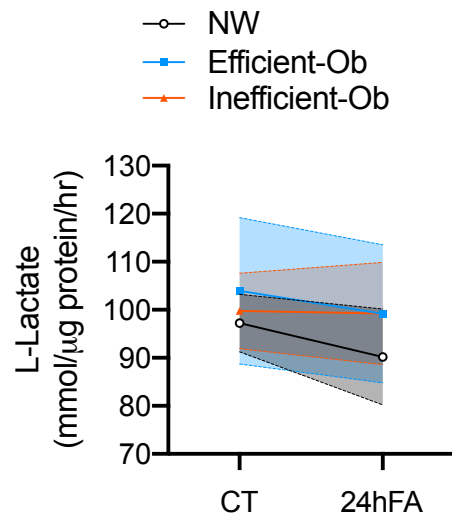

Lactate concentrations in media, an index of glycolysis, were not different across NW, Ef-Ob, and In-Ob MSCs. Mixed model analysis of glycolysis among MSC metabolic phenotypes during two experimental conditions: control and 24hFA exposure (Interaction:  $F=0.116$ ;  $P=0.891$ ; Condition:  $F=0.510$ ,  $P=0.483$ ; Phenotype:  $F=0.238$ ;  $P=0.790$ ).

**SUPPLEMENTARY FIGURE 4:**

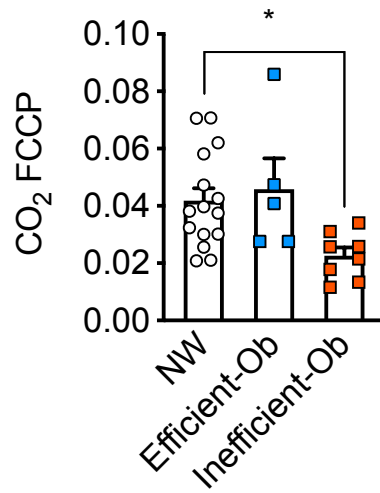

One-way ANOVA indicates significant between group effects ( $F=4.486$ ,  $P=0.022$ ). Sidak-adjusted post-hoc comparisons reveal Inefficient-Ob is significantly reduced compared to normal weight ( $P=0.038$ ) indicated by a and b symbols. Data are presented as means  $\pm$  SE. \* indicates difference between NW and In-Ob ( $P \leq 0.05$ ).
